# Supplementary material for: Proton Pump Inhibitor Intake During Chemoradiotherapy for Rectal Cancer: A Retrospective Study
Source: Research Square preprint supplement (doi:10.21203/rs.3.rs-1015660/v1), 2021-10-28
Supplement: Supplementary file 1 [file 0e4ac073a64e311580befdc1.docx]

Supplementary Information

Article title: Proton pump inhibitor intake during chemoradiotherapy for rectal cancer: a retrospective study

Journal name: Journal of Gastrointestinal Cancer

Author names: Marie Bridoux, Marie-Cécile Le Deley, Nicolas Bertrand, Nicolas Simon, Dienabou Sylla, Xavier Mirabel, Anthony Turpin

Affiliation and e-mail address of the corresponding author: Anthony Turpin, MD, PhD, Oncology Department, CHU Lille, University of Lille, Lille, France

E-mail: [Anthony.turpin@chru-lille.fr](mailto:Anthony.turpin@chru-lille.fr)

1.00

0.90

0.80

0.70

0.60

0.50

0.40

0.30

0.20

0.10

0.00

0 12 24 36 48 60 72 84 96 108 120 132 144 156

Months from diagnosis

Number at risk

215 192 151 133 113 82 52 39 25 17 14 6 3 1

Relapse free survival probability

1 . 0 0

0 . 9 0

0 . 8 0

0 . 7 0

0 . 6 0

0 . 5 0

0 . 4 0

0 . 3 0

0 . 2 0

0 . 1 0

0 . 0 0

0

1 2

2 4

M o n t h s f r o m

3 6

d ia g n o s is

4 8

6 0

N u m b e r a t r i s k

2 1 5 2 0 3

1 8 7

1 7 3

1 3 9

1 0 7

O v e r a l l s u r v i v a l p r o b a b i l i t y

|  | **N=25** | **FREQUENCY (%)** |
| --- | --- | --- |
| **ESOMEPRAZOLE** | 14 | 56 |
| **OMEPRAZOLE** | 6 | 24 |
| **PANTOPRAZOLE** | 3 | 12 |
| **LANSOPRAZOLE** | 1 | 4 |
| **RABEPRAZOLE** | 1 | 4 |

| **TRG** | **DWORAK (N=45)** | **MANDARD (N=3)** | **RÖDEL (N=26)** |
| --- | --- | --- | --- |
| **TRG 0** | 1 |  |  |
| **TRG 1** | 8 |  | 3 |
| **TRG 2** | 8 |  | 3 |
| **TRG 3** | 6 | 2 | 12 |
| **TRG 4** | 22 | 1 | 8 |
